# Supplementary material
Source: Research Square preprint supplement (doi:10.21203/rs.3.rs-4151497/v1)
Supplement: Supplementary file 1 [file fe5bf7af869d3b46eb50721e.xlsx]

## Sheet: merged_geps_bp_gsea
	pathway	cell_fxn	pval_wt	padj_wt	log2err_wt	ES_wt	NES_wt	size_wt	pval_opa1	padj_opa1	log2err_opa1	ES_opa1	NES_opa1	size_opa1	FC	gep1	gep2	gep3	gep4	gep5
CELL_CYCLE_CHECKPOINT_SIGNALING	CELL_CYCLE_CHECKPOINT_SIGNALING	cell cycle	3.55951e-06	0.000110897	0.627257	-0.490414	-2.48659	48	4.30399e-06	7.95586e-05	0.610527	-0.443024	-2.42456	57	-0.0620246	-1.79087	-1.98028	1.99922	1.72098	0
CELL_CYCLE_G2_M_PHASE_TRANSITION	CELL_CYCLE_G2_M_PHASE_TRANSITION	cell cycle	4.07599e-06	0.000116772	0.610527	-0.513556	-2.47197	41	3.44287e-06	6.56298e-05	0.627257	-0.45571	-2.43368	52	-0.0382942	-1.7698	-1.69436	1.8769	1.71595	0
CHROMOSOME_CONDENSATION	CHROMOSOME_CONDENSATION	cell cycle	0.000854956	0.00839124	0.477271	-0.560291	-2.0456	16	0.00065953	0.00509257	0.477271	-0.562896	-2.09209	16	0.0464915	-1.85175	-1.90038	2.06923	1.87552	-2.10101
NEGATIVE_REGULATION_OF_CELL_CYCLE	NEGATIVE_REGULATION_OF_CELL_CYCLE	cell cycle	0.00231985	0.0190623	0.431708	-0.331163	-1.85316	78	0.00189622	0.0117431	0.45506	-0.294814	-1.79203	93	-0.0611237	-1.50672	-1.94031	1.75221	1.66657	-1.35351
NEGATIVE_REGULATION_OF_CELL_CYCLE_PROCESS	NEGATIVE_REGULATION_OF_CELL_CYCLE_PROCESS	cell cycle	0.000981923	0.00954898	0.45506	-0.368055	-2.02294	67	0.000307849	0.00274143	0.498493	-0.342176	-2.00824	77	-0.014699	-1.63245	-2.06443	1.88245	1.69938	-1.34857
POSITIVE_REGULATION_OF_CELL_CYCLE	POSITIVE_REGULATION_OF_CELL_CYCLE	cell cycle	2.68238e-07	2.03094e-05	0.674963	-0.438818	-2.49508	82	5.36064e-09	4.67142e-07	0.761461	-0.43967	-2.68351	96	0.188426	-1.69186	-2.01809	1.95827	1.79103	-1.48254
POSITIVE_REGULATION_OF_CELL_CYCLE_PHASE_TRANSITION	POSITIVE_REGULATION_OF_CELL_CYCLE_PHASE_TRANSITION	cell cycle	3.7663e-06	0.000110897	0.627257	-0.565083	-2.51408	31	9.4637e-07	2.40536e-05	0.659444	-0.517245	-2.55178	39	0.0376931	-1.74698	-2.01117	1.9577	1.69891	0
POSITIVE_REGULATION_OF_CELL_CYCLE_PROCESS	POSITIVE_REGULATION_OF_CELL_CYCLE_PROCESS	cell cycle	1.90843e-07	1.68578e-05	0.690132	-0.464165	-2.56516	70	6.42515e-09	5.22579e-07	0.761461	-0.459337	-2.69684	78	0.131686	-1.882	-2.18192	2.11721	1.89261	-1.68782
REGULATION_OF_CELL_CYCLE_CHECKPOINT	REGULATION_OF_CELL_CYCLE_CHECKPOINT	cell cycle	0.000183264	0.00249052	0.518848	-0.565356	-2.1733	19	4.42917e-05	0.000513748	0.557332	-0.616499	-2.38665	18	0.213352	-1.87501	-1.70683	1.94728	1.73405	-1.58458
REGULATION_OF_CELL_CYCLE_G2_M_PHASE_TRANSITION	REGULATION_OF_CELL_CYCLE_G2_M_PHASE_TRANSITION	cell cycle	6.69001e-05	0.00104285	0.538434	-0.532926	-2.27946	27	0.000503276	0.00403945	0.477271	-0.423516	-2.09005	38	-0.189409	-1.65803	-1.80555	1.6493	1.70299	0
REGULATION_OF_CELL_CYCLE_PHASE_TRANSITION	REGULATION_OF_CELL_CYCLE_PHASE_TRANSITION	cell cycle	3.51906e-05	0.000632237	0.557332	-0.377234	-2.18108	91	2.65583e-06	5.49171e-05	0.627257	-0.362643	-2.30646	112	0.125376	-1.61606	-1.93901	1.85622	1.6704	-1.2509
CELL_CYCLE_DNA_REPLICATION	CELL_CYCLE_DNA_REPLICATION	DNA syn	4.57305e-07	2.42371e-05	0.674963	-0.707564	-2.62212	17	2.67161e-07	7.7604e-06	0.674963	-0.705227	-2.65996	17	0.0378382	-1.95353	-1.97425	2.06887	1.70892	0
DNA_DUPLEX_UNWINDING	DNA_DUPLEX_UNWINDING	DNA syn	0	0	0	0	0	0	0.000244089	0.00223901	0.518848	-0.588683	-2.18793	16	2.18793	-1.75065	0	1.80497	1.61927	0
DNA_REPLICATION	DNA_REPLICATION	DNA syn	4.45504e-07	2.42371e-05	0.674963	-0.436299	-2.47806	81	2.5017e-07	7.44408e-06	0.674963	-0.403337	-2.45957	95	-0.0184878	-2.10162	-2.03189	2.27754	1.67631	0
DNA_REPLICATION_INITIATION	DNA_REPLICATION_INITIATION	DNA syn	0.000485962	0.00536583	0.498493	-0.570377	-2.11373	17	0.000359608	0.00313373	0.498493	-0.569829	-2.20598	18	0.0922512	-2.00924	-2.02897	2.12943	1.65727	0
DNA_STRAND_ELONGATION	DNA_STRAND_ELONGATION	DNA syn	0	0	0	0	0	0	0.00130687	0.00844619	0.45506	-0.538828	-2.03234	17	2.03234	-1.86806	0	1.89556	1.48	0
REGULATION_OF_DNA_REPLICATION	REGULATION_OF_DNA_REPLICATION	DNA syn	0.00129653	0.0116468	0.45506	-0.464178	-2.00474	28	0	0	0	0	0	0	-2.00474	-1.89174	-1.73134	1.90772	1.58824	0
REGULATION_OF_LEUKOCYTE_PROLIFERATION	REGULATION_OF_LEUKOCYTE_PROLIFERATION	growth	0	0	0	0	0	0	0.000724853	0.00545877	0.477271	0.3585	2.24229	37	-2.24229	0	1.61256	-1.71973	0	0
REGULATION_OF_T_CELL_PROLIFERATION	REGULATION_OF_T_CELL_PROLIFERATION	growth	0	0	0	0	0	0	0.0033056	0.0184147	0.431708	0.335141	1.90487	29	-1.90487	0	1.71984	-1.72187	0	0
T_CELL_PROLIFERATION	T_CELL_PROLIFERATION	growth	0	0	0	0	0	0	0.00261064	0.0153124	0.431708	0.305739	1.92139	39	-1.92139	0	1.73457	-1.79524	0	0
ATTACHMENT_OF_SPINDLE_MICROTUBULES_TO_KINETOCHORE	ATTACHMENT_OF_SPINDLE_MICROTUBULES_TO_KINETOCHORE	M phase	1.25083e-05	0.000265177	0.593325	-0.589451	-2.41925	23	2.811e-06	5.53132e-05	0.627257	-0.598728	-2.57588	24	0.156632	-1.98993	-1.86094	2.19496	1.84871	-1.87174
METAPHASE_ANAPHASE_TRANSITION_OF_CELL_CYCLE	METAPHASE_ANAPHASE_TRANSITION_OF_CELL_CYCLE	M phase	3.51142e-05	0.000632237	0.557332	-0.501897	-2.3508	37	1.27868e-07	4.5882e-06	0.690132	-0.549249	-2.71054	38	0.359743	-2.03063	-2.02592	2.19634	1.88807	-1.66941
METAPHASE_CHROMOSOME_ALIGNMENT	METAPHASE_CHROMOSOME_ALIGNMENT	M phase	0.000752686	0.00783844	0.477271	-0.453498	-2.08593	35	2.12648e-05	0.00027024	0.57561	-0.493071	-2.39597	36	0.310041	-2.05944	-1.70304	2.22905	1.80319	-1.78491
MITOTIC_CELL_CYCLE_CHECKPOINT_SIGNALING	MITOTIC_CELL_CYCLE_CHECKPOINT_SIGNALING	M phase	1.11085e-06	4.69276e-05	0.643552	-0.542184	-2.58353	40	2.41264e-06	5.07486e-05	0.627257	-0.479725	-2.49446	47	-0.0890703	-1.8303	-1.92932	2.01943	1.71157	-1.38738
MITOTIC_CELL_CYCLE_PHASE_TRANSITION	MITOTIC_CELL_CYCLE_PHASE_TRANSITION	M phase	3.07704e-07	2.17444e-05	0.674963	-0.403341	-2.42457	109	1.74877e-08	1.01595e-06	0.733762	-0.376888	-2.46299	132	0.0384145	-1.68846	-1.7919	1.89843	1.68064	-1.37247
MITOTIC_METAPHASE_CHROMOSOME_ALIGNMENT	MITOTIC_METAPHASE_CHROMOSOME_ALIGNMENT	M phase	0	0	0	0	0	0	0.00302594	0.0173317	0.431708	-0.490419	-1.99422	21	1.99422	-1.93786	-1.62439	2.06154	1.66525	-1.61021
MITOTIC_SPINDLE_ASSEMBLY	MITOTIC_SPINDLE_ASSEMBLY	M phase	0.000252646	0.00314032	0.498493	-0.534062	-2.19192	23	0.00127616	0.00832572	0.45506	-0.479509	-2.00729	23	-0.184629	-1.79409	0	1.85826	1.70826	-1.84297
MITOTIC_SPINDLE_ORGANIZATION	MITOTIC_SPINDLE_ORGANIZATION	M phase	1.95213e-05	0.000376229	0.57561	-0.483611	-2.40413	44	1.57707e-07	5.20006e-06	0.690132	-0.517988	-2.64735	44	0.243222	-1.97801	-1.91949	2.17346	1.8019	-1.74221
NEGATIVE_REGULATION_OF_MITOTIC_CELL_CYCLE	NEGATIVE_REGULATION_OF_MITOTIC_CELL_CYCLE	M phase	8.63038e-05	0.00128848	0.538434	-0.438615	-2.26313	52	0.0009811	0.00687079	0.45506	-0.354483	-1.96502	61	-0.298115	-1.44515	-1.97439	1.71671	1.6775	-1.59538
NEGATIVE_REGULATION_OF_MITOTIC_CELL_CYCLE_PHASE_TRANSITION	NEGATIVE_REGULATION_OF_MITOTIC_CELL_CYCLE_PHASE_TRANSITION	M phase	4.20705e-05	0.000719271	0.557332	-0.460325	-2.31858	47	0.000345484	0.0030323	0.498493	-0.400475	-2.14438	53	-0.174208	-1.64081	-1.87417	1.84447	1.74901	-1.73249
POSITIVE_REGULATION_OF_CELL_DIVISION	POSITIVE_REGULATION_OF_CELL_DIVISION	M phase	0.000157608	0.00222753	0.518848	-0.603498	-2.20334	16	0.000630421	0.00489882	0.477271	-0.556436	-2.09875	17	-0.104588	-1.7279	0	1.72407	1.69891	-1.55319
POSITIVE_REGULATION_OF_CHROMOSOME_ORGANIZATION	POSITIVE_REGULATION_OF_CHROMOSOME_ORGANIZATION	M phase	0	0	0	0	0	0	0.0110416	0.0464508	0.38073	-0.368057	-1.74241	32	1.74241	-1.5557	-2.02475	1.67721	1.603	0
POSITIVE_REGULATION_OF_MITOTIC_CELL_CYCLE	POSITIVE_REGULATION_OF_MITOTIC_CELL_CYCLE	M phase	5.14659e-06	0.00012989	0.610527	-0.552991	-2.4338	30	2.40239e-07	7.3273e-06	0.674963	-0.538523	-2.67756	40	0.243764	-1.64783	-1.94407	1.77349	1.6768	0
POSITIVE_REGULATION_OF_MITOTIC_CELL_CYCLE_PHASE_TRANSITION	POSITIVE_REGULATION_OF_MITOTIC_CELL_CYCLE_PHASE_TRANSITION	M phase	1.52716e-06	5.78139e-05	0.643552	-0.597575	-2.55598	27	2.2309e-06	4.86018e-05	0.627257	-0.545064	-2.62424	34	0.0682574	-1.70775	-1.96696	1.89759	1.6997	0
REGULATION_OF_CELL_DIVISION	REGULATION_OF_CELL_DIVISION	M phase	0	0	0	0	0	0	0.00767128	0.0349215	0.407018	-0.381145	-1.80437	32	1.80437	-1.68168	0	1.70978	1.67784	-1.58097
REGULATION_OF_MITOTIC_CELL_CYCLE	REGULATION_OF_MITOTIC_CELL_CYCLE	M phase	1.15105e-06	4.69276e-05	0.643552	-0.389862	-2.34674	108	1.38577e-08	8.87338e-07	0.74774	-0.388244	-2.52158	129	0.174838	-1.59097	-1.89974	1.81686	1.65165	-1.26179
REGULATION_OF_MITOTIC_CELL_CYCLE_PHASE_TRANSITION	REGULATION_OF_MITOTIC_CELL_CYCLE_PHASE_TRANSITION	M phase	1.79109e-05	0.000351584	0.57561	-0.39573	-2.25662	83	7.07791e-06	0.000112143	0.610527	-0.369408	-2.28101	100	0.024385	-1.67087	-1.8806	1.83692	1.71483	-1.42221
SPINDLE_CHECKPOINT_SIGNALING	SPINDLE_CHECKPOINT_SIGNALING	M phase	4.47065e-05	0.000752205	0.557332	-0.564537	-2.36137	25	2.31701e-06	4.95922e-05	0.627257	-0.573239	-2.55741	27	0.196042	-2.06878	-2.11331	2.24363	1.87875	-1.89391
SPINDLE_ORGANIZATION	SPINDLE_ORGANIZATION	M phase	3.72782e-06	0.000110897	0.627257	-0.455678	-2.41688	58	4.27842e-08	1.93321e-06	0.719513	-0.490512	-2.70278	59	0.285897	-1.89939	-1.89365	2.13354	1.7701	-1.78603
CHROMOSOME_SEGREGATION	CHROMOSOME_SEGREGATION	M phase - Anaphase	2.33872e-08	3.54149e-06	0.733762	-0.400943	-2.45876	129	4.22396e-12	8.58872e-10	0.887075	-0.435441	-2.84563	132	0.386871	-2.11589	-2.1068	2.37412	1.86441	-1.83867
CHROMOSOME_SEPARATION	CHROMOSOME_SEPARATION	M phase - Anaphase	7.45256e-08	7.18156e-06	0.704976	-0.584354	-2.73701	37	1.2519e-07	4.5882e-06	0.690132	-0.549627	-2.71241	38	-0.0246088	-2.12288	-2.20708	2.3358	1.93737	-2.18332
MITOTIC_SISTER_CHROMATID_SEGREGATION	MITOTIC_SISTER_CHROMATID_SEGREGATION	M phase - Anaphase	6.24882e-07	3.0108e-05	0.659444	-0.457028	-2.54375	73	1.68138e-07	5.39811e-06	0.690132	-0.448012	-2.59395	73	0.0501993	-2.11231	-2.16005	2.35141	1.94604	-2.06244
MITOTIC_SISTER_CHROMATID_SEPARATION	MITOTIC_SISTER_CHROMATID_SEPARATION	M phase - Anaphase	1.22717e-05	0.000265177	0.593325	-0.554058	-2.41415	29	2.20697e-06	4.86018e-05	0.627257	-0.55488	-2.57998	30	0.165821	-2.0727	-2.09987	2.24321	1.90041	-2.03026
POSITIVE_REGULATION_OF_CHROMOSOME_SEGREGATION	POSITIVE_REGULATION_OF_CHROMOSOME_SEGREGATION	M phase - Anaphase	4.30359e-06	0.000116835	0.610527	-0.674416	-2.46226	16	2.76528e-06	5.53132e-05	0.627257	-0.663809	-2.50374	17	0.0414787	-1.87082	-2.01532	2.10899	1.85148	-1.82067
POSITIVE_REGULATION_OF_CHROMOSOME_SEPARATION	POSITIVE_REGULATION_OF_CHROMOSOME_SEPARATION	M phase - Anaphase	2.28376e-05	0.000432282	0.57561	-0.648113	-2.40181	17	1.00522e-06	2.5028e-05	0.643552	-0.682458	-2.57408	17	0.172276	-1.93854	-1.86806	2.0681	1.86957	-2.14623
REGULATION_OF_CHROMOSOME_SEGREGATION	REGULATION_OF_CHROMOSOME_SEGREGATION	M phase - Anaphase	3.49244e-07	2.31374e-05	0.674963	-0.518094	-2.62694	48	3.36442e-08	1.63471e-06	0.719513	-0.514463	-2.74744	52	0.120502	-2.06438	-2.26544	2.31625	1.97405	-1.84412
REGULATION_OF_MITOTIC_SISTER_CHROMATID_SEGREGATION	REGULATION_OF_MITOTIC_SISTER_CHROMATID_SEGREGATION	M phase - Anaphase	1.39901e-06	5.4924e-05	0.643552	-0.615362	-2.60013	26	2.85746e-06	5.53349e-05	0.627257	-0.562041	-2.53924	28	-0.0608952	-1.99372	-2.21832	2.27815	1.91538	-2.01439
REGULATION_OF_SISTER_CHROMATID_SEGREGATION	REGULATION_OF_SISTER_CHROMATID_SEGREGATION	M phase - Anaphase	4.66079e-06	0.000120498	0.610527	-0.515887	-2.43369	38	1.35555e-07	4.72508e-06	0.690132	-0.544408	-2.70682	40	0.273133	-1.98454	-2.08942	2.21522	1.89567	-1.73672
SISTER_CHROMATID_SEGREGATION	SISTER_CHROMATID_SEGREGATION	M phase - Anaphase	4.26845e-07	2.42371e-05	0.674963	-0.434508	-2.47058	82	1.41885e-08	8.87338e-07	0.74774	-0.447808	-2.66928	83	0.198701	-2.05808	-2.17415	2.27387	1.9129	-1.93531
CYTOKINESIS	CYTOKINESIS	M phase - cytokinesis	0.000784402	0.00792266	0.477271	-0.441336	-2.06714	37	0.000116023	0.00120981	0.538434	-0.474849	-2.28618	34	0.219039	-1.82451	0	1.63352	1.72023	-2.08543
CYTOSKELETON_DEPENDENT_CYTOKINESIS	CYTOSKELETON_DEPENDENT_CYTOKINESIS	M phase - cytokinesis	6.18357e-05	0.000993118	0.538434	-0.562683	-2.30938	23	1.47893e-05	0.000205034	0.593325	-0.616942	-2.4825	20	0.173115	-1.86061	0	1.64494	1.65128	-1.98729
MICROTUBULE_CYTOSKELETON_ORGANIZATION_INVOLVED_IN_MITOSIS	MICROTUBULE_CYTOSKELETON_ORGANIZATION_INVOLVED_IN_MITOSIS	M phase - cytokinesis	3.93369e-07	2.42371e-05	0.674963	-0.506357	-2.61266	52	8.80451e-09	6.71344e-07	0.74774	-0.529359	-2.82699	52	0.214324	-2.01317	-1.85265	2.20531	1.84541	-1.87343
MITOTIC_CYTOKINESIS	MITOTIC_CYTOKINESIS	M phase - cytokinesis	4.18152e-05	0.000719271	0.557332	-0.581933	-2.34433	22	1.47893e-05	0.000205034	0.593325	-0.616942	-2.4825	20	0.138167	-1.86402	0	1.70391	1.68457	-2.05442
POSITIVE_REGULATION_OF_CYTOKINESIS	POSITIVE_REGULATION_OF_CYTOKINESIS	M phase - cytokinesis	0	0	0	0	0	0	0.000539566	0.00427449	0.477271	-0.580719	-2.10374	15	2.10374	-1.76137	0	1.7415	1.73136	-1.83179
REGULATION_OF_CYTOKINESIS	REGULATION_OF_CYTOKINESIS	M phase - cytokinesis	0.000832936	0.00825151	0.477271	-0.496546	-2.07697	25	0.000769133	0.00567206	0.477271	-0.484776	-2.15187	26	0.0748978	-1.85137	0	1.81814	1.76002	-1.98268
MITOTIC_NUCLEAR_DIVISION	MITOTIC_NUCLEAR_DIVISION	M phase - nucleus	2.42248e-07	1.97526e-05	0.674963	-0.438617	-2.527	87	1.12394e-08	8.06591e-07	0.74774	-0.443622	-2.68269	91	0.15569	-2.02555	-2.12811	2.30538	1.82818	-1.76615
NEGATIVE_REGULATION_OF_NUCLEAR_DIVISION	NEGATIVE_REGULATION_OF_NUCLEAR_DIVISION	M phase - nucleus	2.73964e-06	9.15834e-05	0.627257	-0.605409	-2.53233	25	1.94277e-05	0.000249493	0.57561	-0.53299	-2.40799	28	-0.124337	-1.95703	-2.23054	2.2531	1.8798	-1.59872
REGULATION_OF_MITOTIC_NUCLEAR_DIVISION	REGULATION_OF_MITOTIC_NUCLEAR_DIVISION	M phase - nucleus	4.40886e-06	0.000116835	0.610527	-0.516974	-2.43882	38	2.76438e-07	7.84312e-06	0.674963	-0.530686	-2.65347	41	0.21465	-2.01304	-2.09085	2.28535	1.84408	-1.67607
REGULATION_OF_NUCLEAR_DIVISION	REGULATION_OF_NUCLEAR_DIVISION	M phase - nucleus	1.06148e-05	0.000240151	0.593325	-0.500618	-2.40969	41	2.95662e-07	8.19791e-06	0.674963	-0.509778	-2.60539	44	0.195699	-1.9993	-2.01418	2.27061	1.84644	-1.59419
ATP_BIOSYNTHETIC_PROCESS	ATP_BIOSYNTHETIC_PROCESS	Metabolic	0.0047615	0.0338738	0.407018	-0.379633	-1.88723	44	2.2059e-05	0.000277443	0.57561	-0.449654	-2.3381	47	0.450865	-2.3214	2.2512	2.47765	-2.81082	2.29063
ATP_METABOLIC_PROCESS	ATP_METABOLIC_PROCESS	Metabolic	0.0054349	0.0366943	0.407018	-0.361503	-1.83296	48	1.35666e-05	0.000192456	0.593325	-0.434718	-2.32157	52	0.488611	-2.27627	2.12368	2.45025	-2.6277	2.2691
CARBOHYDRATE_CATABOLIC_PROCESS	CARBOHYDRATE_CATABOLIC_PROCESS	Metabolic	0	0	0	0	0	0	0.00876602	0.0389235	0.38073	-0.402416	-1.79531	27	1.79531	0	0	0	0	1.48613
CARBOHYDRATE_DERIVATIVE_CATABOLIC_PROCESS	CARBOHYDRATE_DERIVATIVE_CATABOLIC_PROCESS	Metabolic	0.00745323	0.0462013	0.407018	-0.471882	-1.81398	19	0	0	0	0	0	0	-1.81398	-1.48944	1.58654	0	0	0
CELLULAR_ALDEHYDE_METABOLIC_PROCESS	CELLULAR_ALDEHYDE_METABOLIC_PROCESS	Metabolic	0	0	0	0	0	0	0.00335952	0.0186301	0.431708	-0.513326	-1.85961	15	1.85961	-1.77941	0	2.10137	-2.17354	1.95642
GENERATION_OF_PRECURSOR_METABOLITES_AND_ENERGY	GENERATION_OF_PRECURSOR_METABOLITES_AND_ENERGY	Metabolic	0.000595777	0.00631524	0.477271	-0.323825	-1.9206	104	1.46119e-07	4.95183e-06	0.690132	-0.372274	-2.39756	125	0.476953	-1.98358	1.76396	2.14368	0	2.02024
GLUCOSE_METABOLIC_PROCESS	GLUCOSE_METABOLIC_PROCESS	Metabolic	0	0	0	0	0	0	0.00101261	0.00698673	0.45506	-0.430132	-2.05433	33	2.05433	0	0	1.36102	0	1.63429
GLYCEROLIPID_METABOLIC_PROCESS	GLYCEROLIPID_METABOLIC_PROCESS	Metabolic	0	0	0	0	0	0	0.00571735	0.0273536	0.407018	0.323633	1.84761	30	-1.84761	0	0	-1.54511	0	0
GLYCOPROTEIN_BIOSYNTHETIC_PROCESS	GLYCOPROTEIN_BIOSYNTHETIC_PROCESS	Metabolic	0.0059426	0.0391252	0.407018	0.324116	1.84867	27	0.00330117	0.0184147	0.431708	0.377343	2.01032	25	-0.161646	0	0	0	1.28693	0
GLYCOPROTEIN_METABOLIC_PROCESS	GLYCOPROTEIN_METABOLIC_PROCESS	Metabolic	0	0	0	0	0	0	0.00382105	0.0207186	0.431708	0.32788	1.92367	31	-1.92367	0	0	0	1.30269	0
MONOCARBOXYLIC_ACID_BIOSYNTHETIC_PROCESS	MONOCARBOXYLIC_ACID_BIOSYNTHETIC_PROCESS	Metabolic	0	0	0	0	0	0	0.00985182	0.0429258	0.38073	-0.445633	-1.76998	19	1.76998	0	0	0	0	1.67541
MONOCARBOXYLIC_ACID_METABOLIC_PROCESS	MONOCARBOXYLIC_ACID_METABOLIC_PROCESS	Metabolic	0	0	0	0	0	0	0.00571549	0.0273536	0.407018	-0.319457	-1.77086	61	1.77086	0	0	0	0	1.58662
MONOSACCHARIDE_METABOLIC_PROCESS	MONOSACCHARIDE_METABOLIC_PROCESS	Metabolic	0	0	0	0	0	0	0.00141834	0.00901236	0.45506	-0.394222	-1.96009	40	1.96009	0	0	1.35106	0	1.55443
ORGANIC_ACID_BIOSYNTHETIC_PROCESS	ORGANIC_ACID_BIOSYNTHETIC_PROCESS	Metabolic	0	0	0	0	0	0	0.000483084	0.00390306	0.498493	-0.414466	-2.04472	39	2.04472	-1.43192	0	1.39318	0	2.0818
PROTEASOMAL_PROTEIN_CATABOLIC_PROCESS	PROTEASOMAL_PROTEIN_CATABOLIC_PROCESS	Metabolic	0	0	0	0	0	0	0.00878517	0.0389235	0.38073	-0.270438	-1.65183	97	1.65183	-1.30947	0	0	1.22838	0
PYRUVATE_METABOLIC_PROCESS	PYRUVATE_METABOLIC_PROCESS	Metabolic	0	0	0	0	0	0	0.00527386	0.026049	0.407018	-0.433919	-1.86683	24	1.86683	0	0	0	0	1.68679
SMALL_MOLECULE_BIOSYNTHETIC_PROCESS	SMALL_MOLECULE_BIOSYNTHETIC_PROCESS	Metabolic	0	0	0	0	0	0	0.000251726	0.00229184	0.498493	-0.346613	-2.03428	77	2.03428	-1.45278	0	1.46792	0	1.89286
SMALL_MOLECULE_CATABOLIC_PROCESS	SMALL_MOLECULE_CATABOLIC_PROCESS	Metabolic	0.00666107	0.0425171	0.407018	-0.422491	-1.84089	29	0	0	0	0	0	0	-1.84089	-1.5134	0	1.6906	0	1.82892
						DN
